# Supplementary material for: Carbonate Micromotors for Treatment of Construction Effluents
Source: Nanomaterials (Basel). 2020 Jul 19;10(7):1408. doi: 10.3390/nano10071408 (PMC7407598; doi:10.3390/nano10071408)
Supplement: Supplementary file 1 [file nanomaterials-10-01408-s001.zip]

Archive with 5 entries (5 files):
- Carbonate_motors_to_remediate_raised_pH_values_in_building_effluents (2).pdf
- Supplementary Videos/Video S1.avi
- Supplementary Videos/Video S2.avi
- Supplementary Videos/Video S3.avi
- Supplementary Videos/Video S4.avi
